# Supplementary material
Source: PubMed Central journal article supplement (PMC2782008)

Kockx et al Suppl. Fig 1.

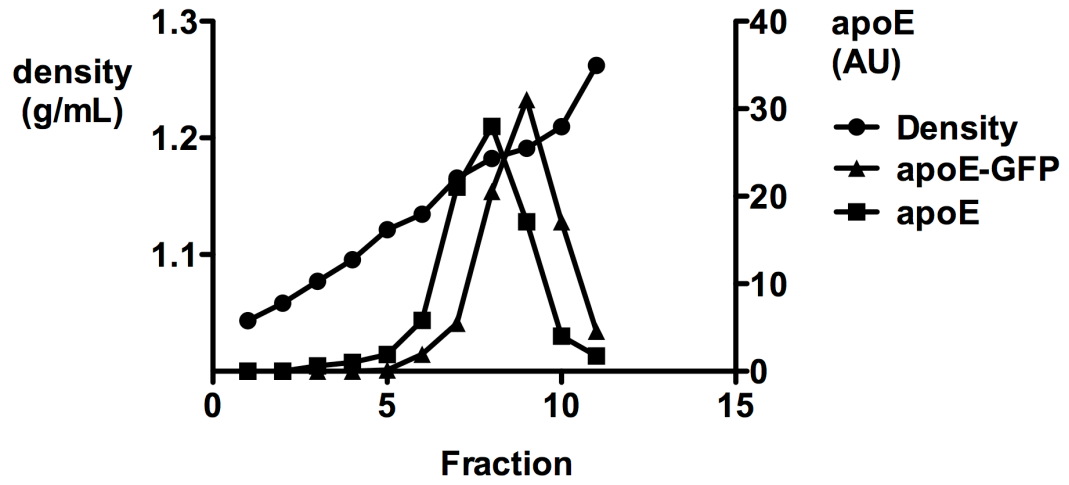

Kockx et al Suppl. Fig 2.

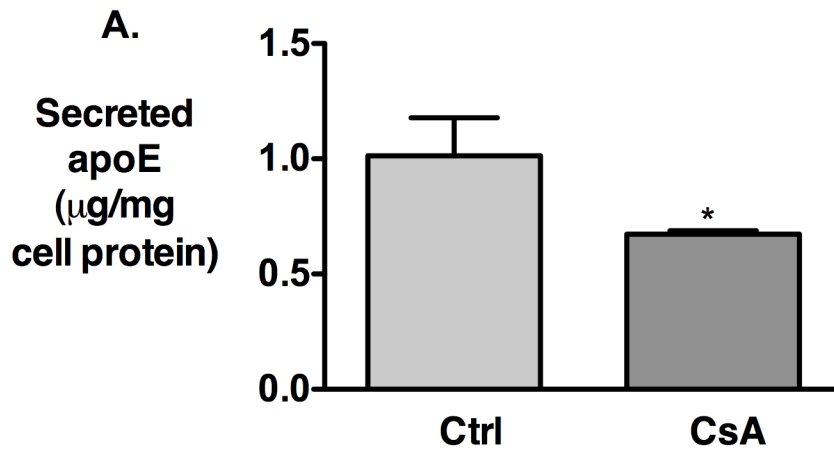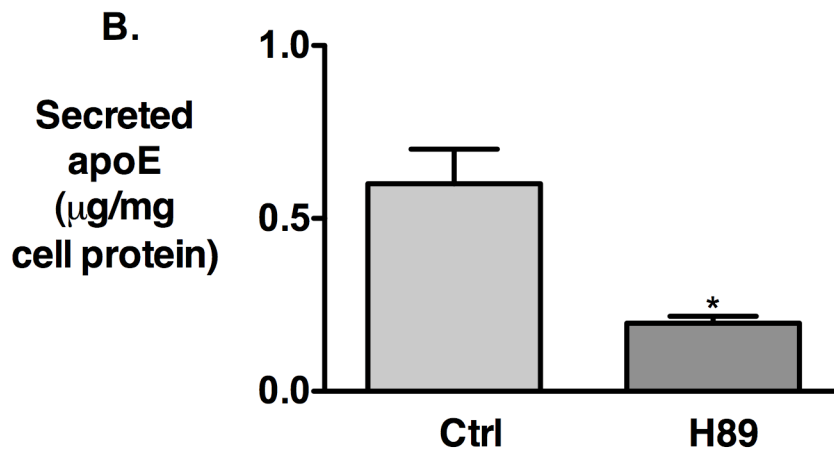

Kockx et al Suppl. Fig 3.

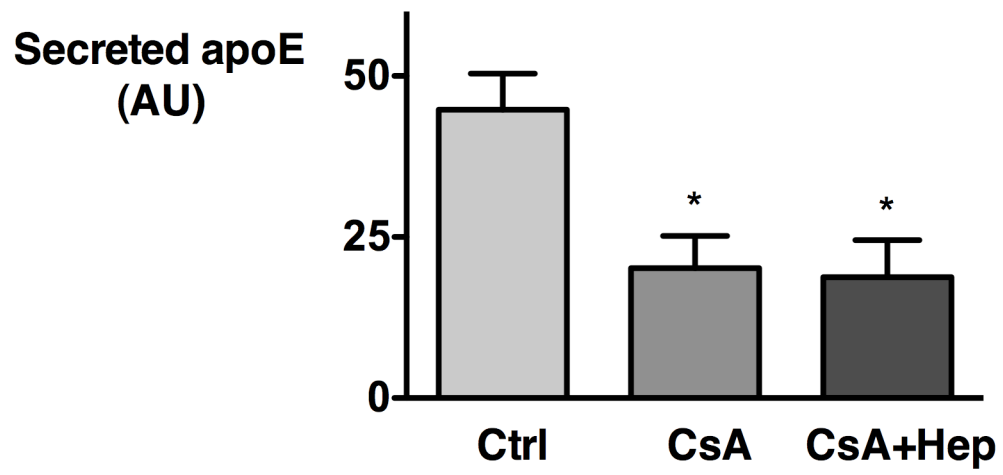

Supplement: supp_M109.032615_jbc.M109.032615-1.pdf [file supp_M109.032615_jbc.M109.032615-1.pdf]
